# Supplementary material for: Genome Wide Identification of Key Components of RNA Silencing in Two <em>Phaseolus vulgaris</em> Genotypes of Contrasting Origin and Their Expression Analyses in Response to Fungal Infection
Source: Preprints.org preprint supplement (doi:10.20944/preprints202112.0071.v1), 2021-12-06
Supplement: Supplementary file 3 [file Table S1.docx]

**Table S1:** List of primer sequences used in this study.

| **Gene name** | **Primer name** | **Primer Sequence (5’-3’)** | **Product length (bp)** | **Reference** |
| --- | --- | --- | --- | --- |
| PvM AGO1 | AGO1_F | GGCAGACCTTCACCATTT | 106 | This study |
| AGO1_R | TGTAGTAGGGAGTTCACGGA |
| PvM AGO2a | AGO2_F | AAGATTCAGGTTACAAGTGCC | 100 | This study |
| AGO2_R | TGGTCCTTCGCATCATTA |
| PvM AGO4a | AGO4a_2_F: | ACCACCTGCTATCCCATCAG | 114 | This study |
| AGO4a_2_R: | CGCAACTTCGTCCCTTTAGA |
| PvM AGO4b | AGO4b_1_F: | TAGGGAGAAAGGTGCTCGAA | 121 | This study |
| AGO4b_1_R: | AGACGATTACGGGCAAGAGA |
| PvM AGO4c | AGO4c 5 F | GTACGAGGACTTGTGCGTGA | 75 | This study |
| AGO4c_5_R | CACCTCAAACGGCTGCTCTA |
| PvM DCL2a | DCL2a_F | TAACACCTGAAACATTGAAGC | 100 | This study |
| DCL2a_R | TCTTTGCGAGATACCACACT |
| PvM DCL2b | DCL2b_F | CTGCTCTGTTGTTTATGGACT | 92 | This study |
| DCL2b_R | CAGTTTCTCTGGTTGAATGTC |
| **Reference genes** |  |  |  |  |
| Unknown 1 | Ukn1-F | ATTCCCATCATGCAGCAAAG | 192 | [48] |
| Ukn1-R | AGATCCCTCCAGGTCAATCC |  |
| Unknown 2 | Ukn2-F | CCAATTCAACCATCCCTCAC | 153 | [48] |
| Ukn2-R | AAACTCCTCTGCACCCTCAG |  |
| Actin-11 | Act11-F | TGCATACGTTGGTGATGAGG | 190 | [48] |
| Act11-R | AGCCTTGGGGTTAAGAGGAG |  |
